# Supplementary material for: Inactivating the permanent neonatal diabetes gene Mnx1 switches insulin-producing β-cells to a δ-like fate and reveals a facultative proliferative capacity in aged β-cells
Source: Oxford University Press journal article supplement (doi:10.1242/dev.126011), 2015-11-01
Supplement: dev126011supp.pdf [file dev126011supp.pdf]

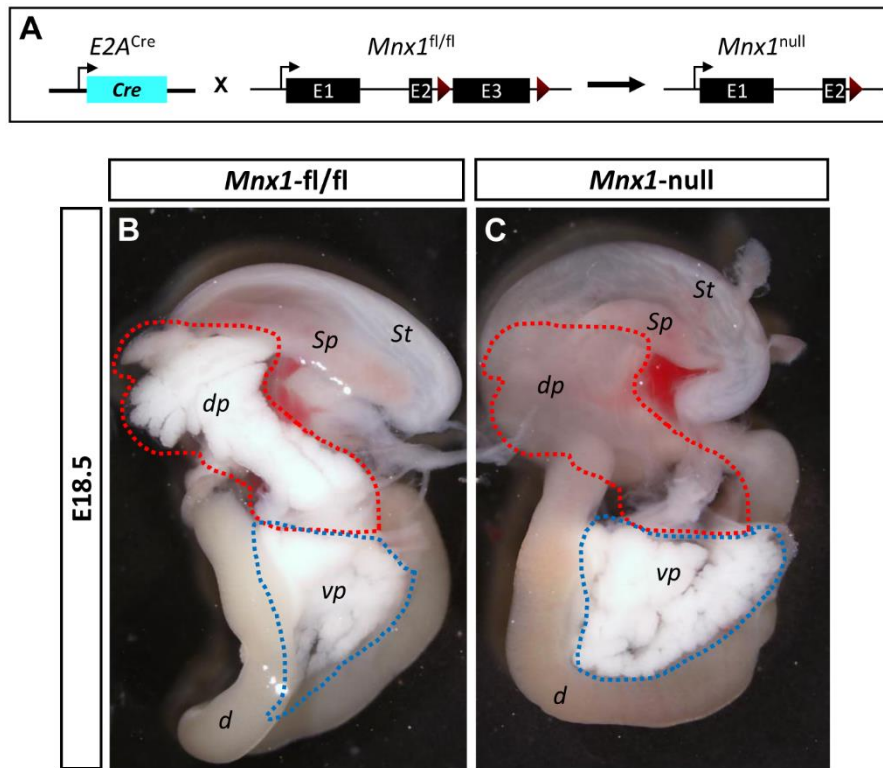

**Supplementary Fig. 1** Verification of *Mnx1* floxed allele using germ-line activated Cre line (*EIIA<sup>Cre</sup>*). (A) Schematic showing generation of *Mnx1* global null mice by crossing *Mnx1<sup>fl/fl</sup>* mice to the germ line deleter *EIIA<sup>Cre</sup>*. (B, C) Gross morphology of E18.5 gut show the absence of dorsal pancreas (demarcated in red dotted line), whereas ventral pancreas (delineated by blue dotted line) develop normally in the *Mnx1<sup>null</sup>* mice. We are not able to test for the presence of the truncated protein with the currently available specific Mnx1 antibody using immunofluorescence, because this antibody was raised against the C-terminal region of Mnx1, which is absent when exon 3 is deleted. Nevertheless, the *EIIA<sup>Cre</sup>;Mnx1<sup>FL/+</sup>*, *Ngn3-Cre;Mnx1<sup>FL/+</sup>* and *RIP2-Cre;Mnx1<sup>FL/+</sup>* mice are normal and do not exhibit any defects in motor neuron function, pancreatic endocrine differentiation and  $\beta$ -cell function, suggesting that the truncated protein is either not made or is degraded, not exhibiting any dominant negative effects.

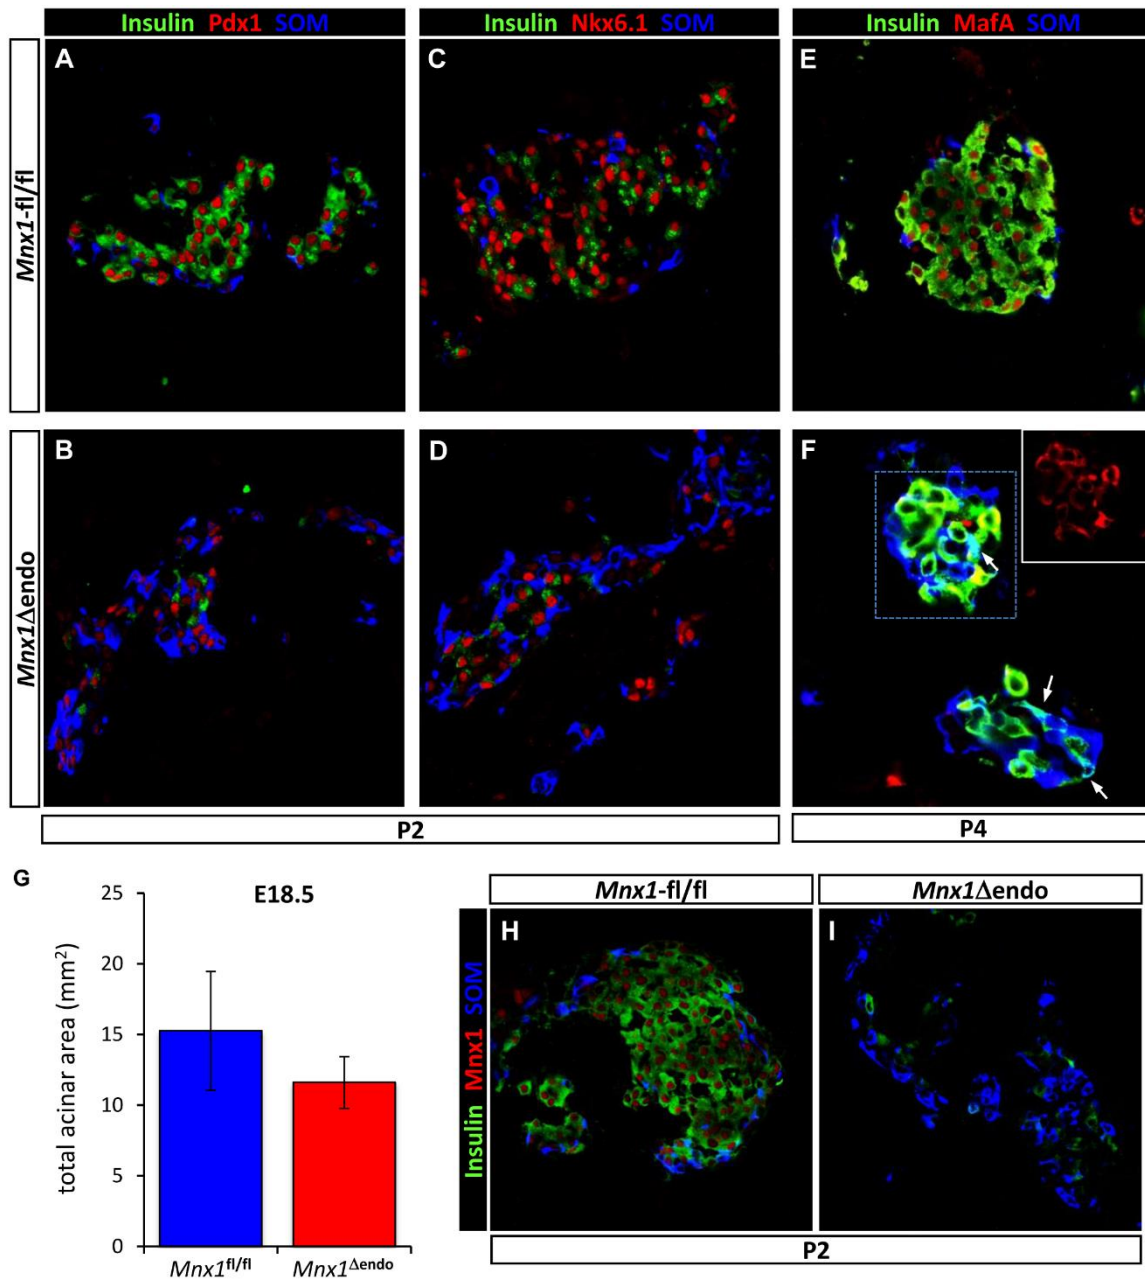

**Supplementary Fig. 2** The remaining  $\beta$  cells in *Mnx1*<sup>Δendo</sup> are not mature. Immunofluorescence analysis show that the remaining  $\beta$  cells in the *Mnx1*<sup>Δendo</sup> expressed (A, B) Pdx1, and (C, D) Nkx6.1 as in control. (E, F) But MafA protein become localized to the cytoplasm compared to the nucleus localization in control  $\beta$  cell, indicating that these mutant  $\beta$  cells are immature. Insulin<sup>+</sup>somatostatin<sup>+</sup> cells (arrow) were MafA<sup>-</sup> indicating the departure of this cell type from  $\beta$  cells. (G) Total acinar area were not changed significantly in *Mnx1*<sup>Δendo</sup>. (H, I) The remaining  $\beta$  cells in the *Mnx1*<sup>Δendo</sup> mutants do not express Mnx1.

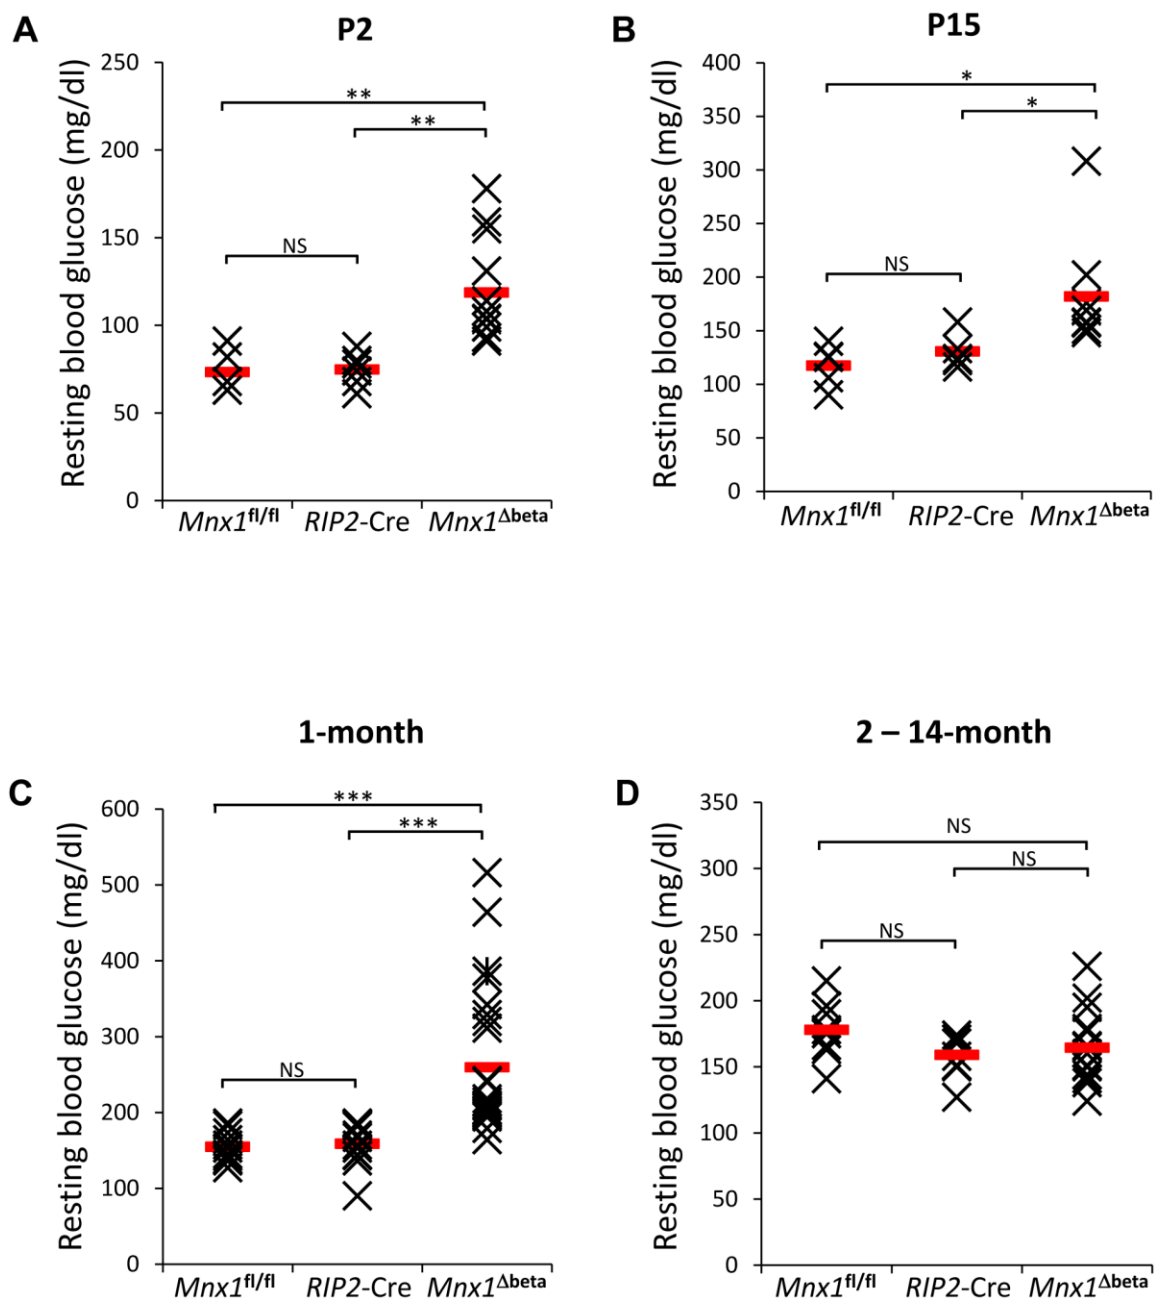

**Supplementary Fig. 3** Resting blood glucose of *Mnx1<sup>Δbeta</sup>* mutants improved with age. Measurement of resting blood glucose of *Mnx1<sup>fl/fl</sup>*, *RIP2-Cre* and *Mnx1<sup>Δbeta</sup>* mice at (A) P2, (B) P15, (C) 1-month old, and (D) 2 – 14-month old show a slightly elevated blood glucose at early age but blood glucose level improved with age. \* $p < 0.05$ , \*\* $p < 0.005$ , \*\*\* $p < 0.001$

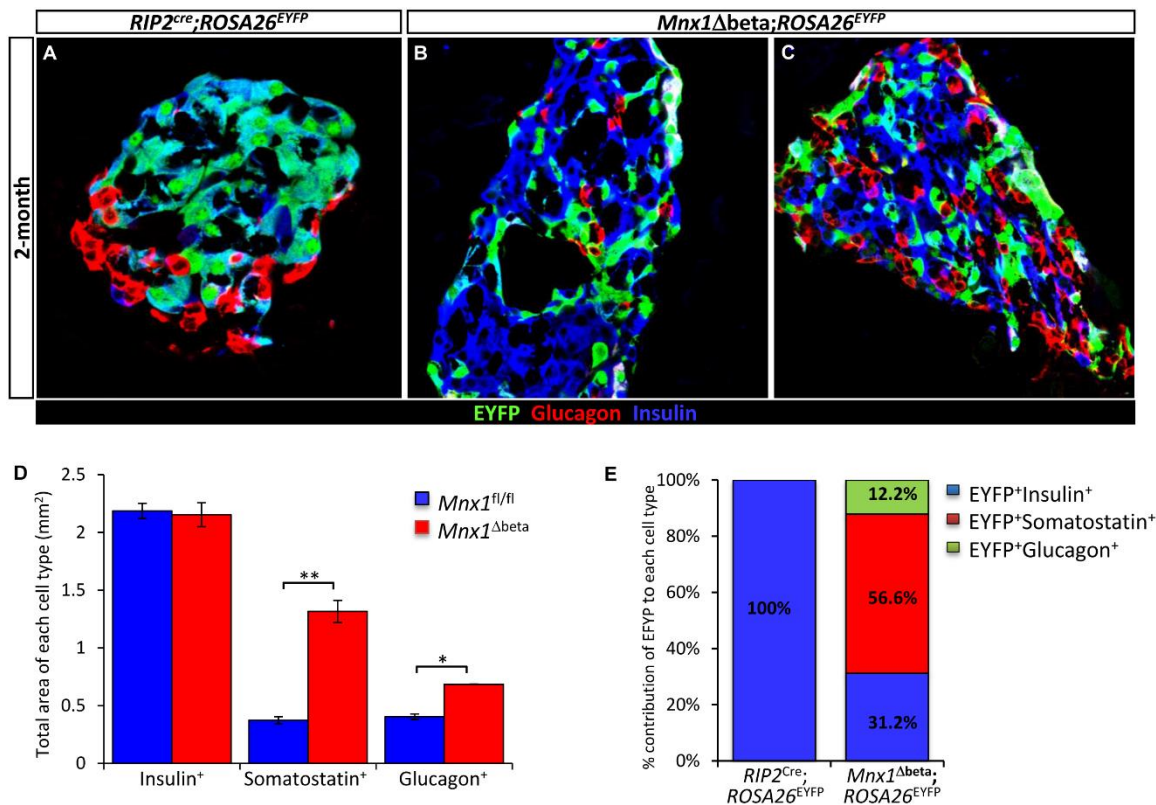

**Supplementary Fig. 4 β-to-α transdifferentiation was also observed in *Mnx1<sup>Δbeta</sup>* mutants, albeit at lower frequency.** (A, B, C) The presence of EYFP<sup>+</sup>Glucagon<sup>+</sup> cells in *Mnx1<sup>Δbeta</sup>* islets indicate β-to-α transdifferentiation also occurred when *Mnx1* function is deleted in β cells. (D) Quantitative analysis of total area of each hormone<sup>+</sup> cell types show that β-cell numbers were restored at 4-month old *Mnx1<sup>Δbeta</sup>*, concomitant with increased of δ and α-cell numbers; (E) Quantitative analysis show that the percentage contribution of EYFP<sup>+</sup> cell in each of the β, δ, and α cell compartments in *RIP2<sup>Cre</sup>* and *Mnx1<sup>Δbeta</sup>* mutants.

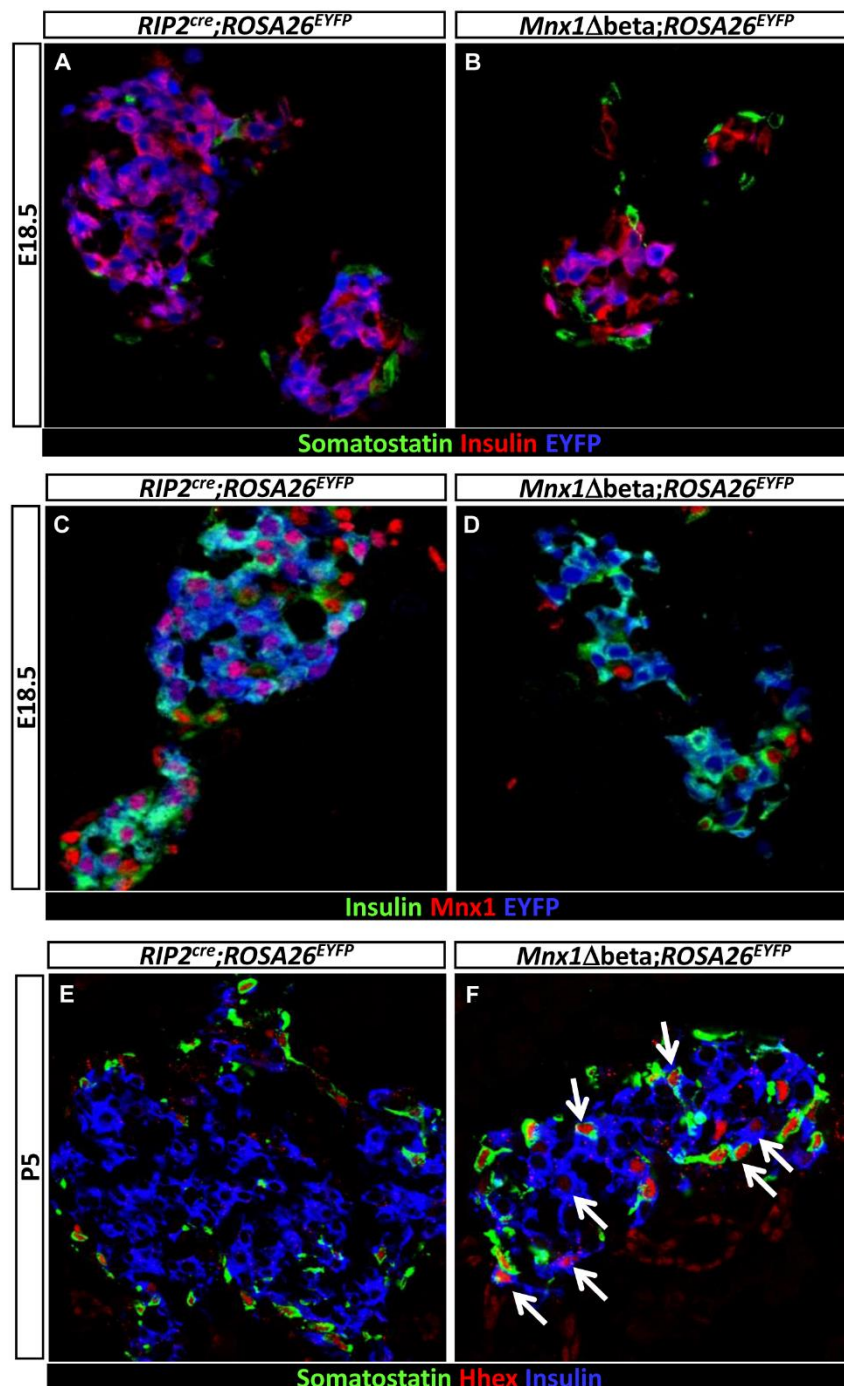

**Supplementary Fig. 5** Initiation of  $\beta$ -to- $\delta$  cell transdifferentiation in  $Mnx1^{\Delta\beta}$  mutants was observed at P5 but not at E18.5. (A, B) Immunofluorescence analysis with EYFP, insulin and somatostatin show the absence of EYFP<sup>+</sup>somatostatin<sup>+</sup> cells at E18.5 in  $Mnx1^{\Delta\beta}$  mice, indicating no  $\beta$ -to- $\delta$  transdifferentiation at this stage. (C, D) All EYFP<sup>+</sup> cells are  $Mnx1^{-}$ , indicating  $Mnx1$  is efficiently deleted in the  $Mnx1^{\Delta\beta}$   $\beta$  cells at E18.5. (E, F) The presence of Hhex<sup>+</sup>insulin<sup>+</sup> and Hhex<sup>+</sup>insulin<sup>+</sup>somatostatin<sup>+</sup> (white arrows) cells in the  $Mnx1^{\Delta\beta}$  mutants at P5 indicate the initiation of  $\beta$ -to- $\delta$  transdifferentiation.



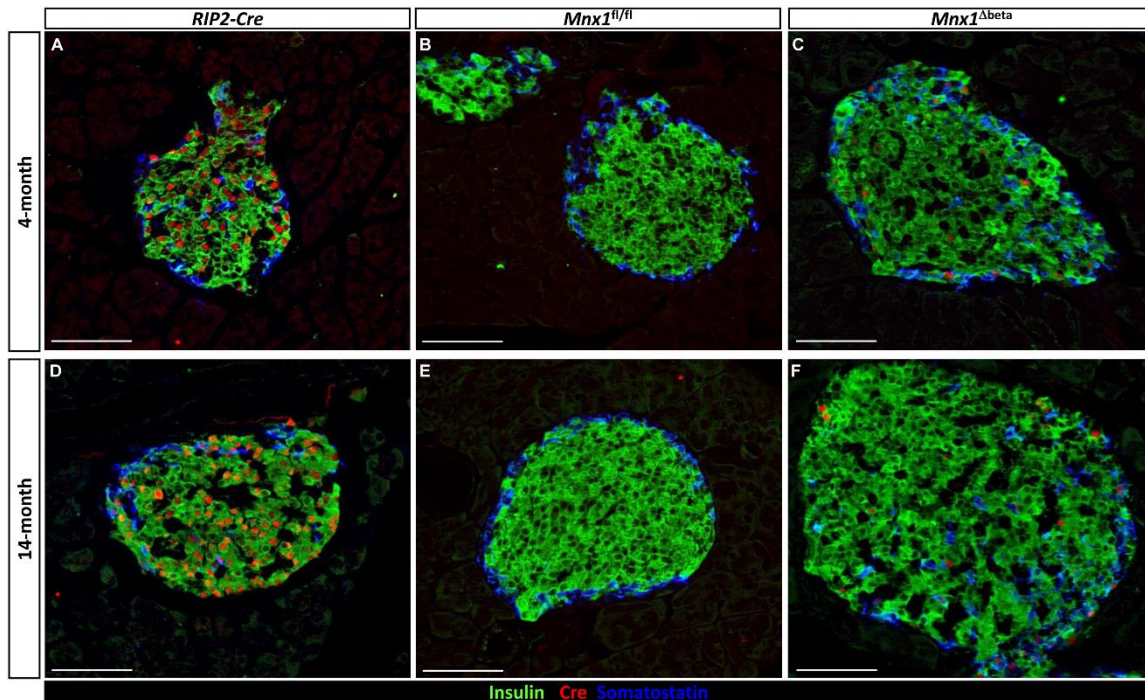

**Supplementary Fig. 6 Escaper  $\beta$  cells in *Mnx1<sup>Δbeta</sup>* mutants were devoided of Cre.** Immunolabeling of Cre showed that majority of the escaper  $\beta$  cells that repopulated the islet in *Mnx1<sup>Δbeta</sup>* do not produce Cre recombinase at (A, B, C) 4 months and, (D, E, F) 14 months, compared to the RIP2-Cre control islets. It is noteworthy that even in RIP2-Cre islets, 15-20% of insulin<sup>+</sup>  $\beta$  cells do not produce Cre recombinase, consistent with the 85% recombination efficiency in the islet in this allele. Scale bar, 25  $\mu$ m.

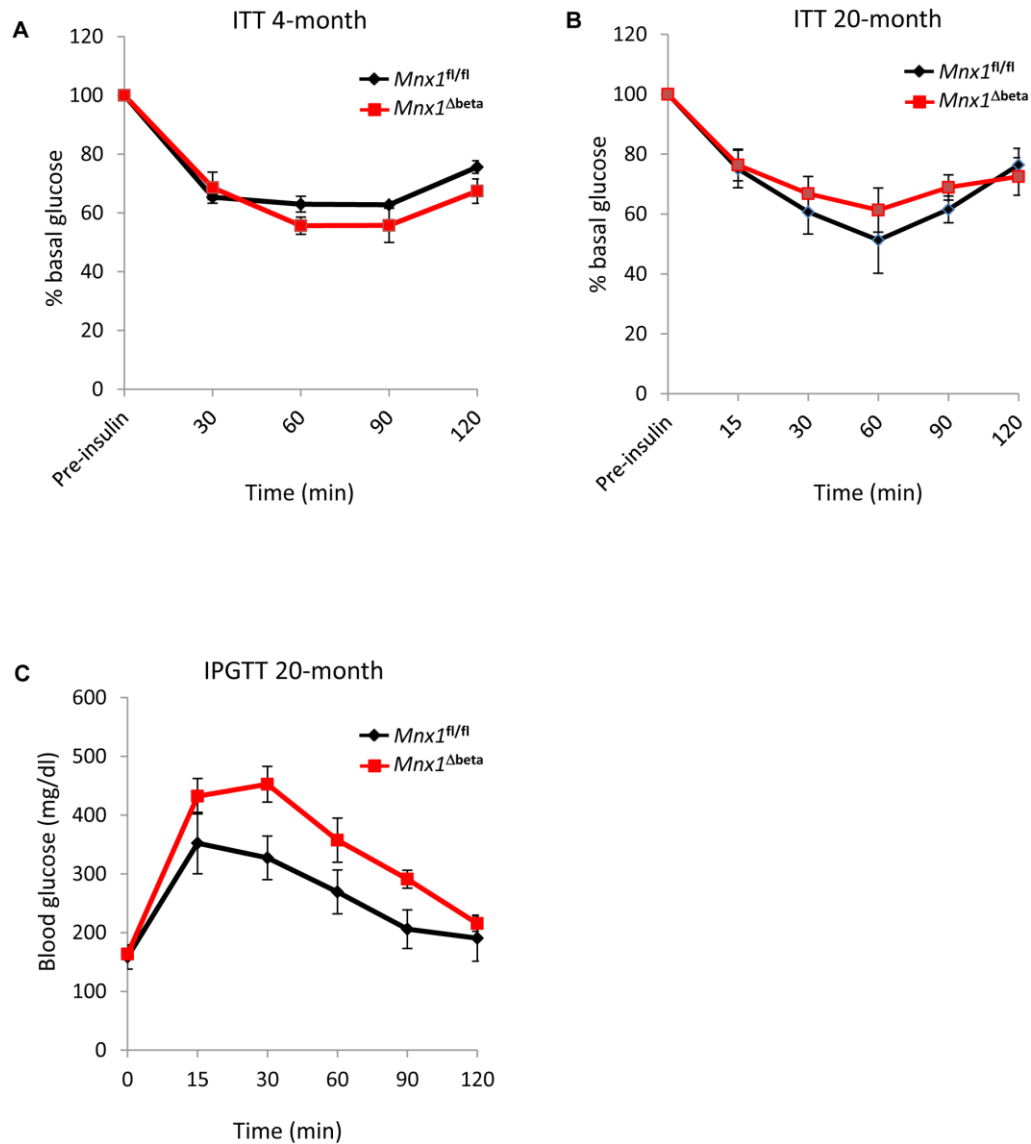

**Supplementary Fig. 7 Glucose clearance defects in *Mnx1<sup>Δbeta</sup>* mutants were not caused by peripheral insulin resistance.** (A) Insulin tolerance test on *Mnx1<sup>fl/fl</sup>* and *Mnx1<sup>Δbeta</sup>* indicate that *Mnx1<sup>Δbeta</sup>* mice do not have peripheral insulin resistance at 6-month old, but (B) developed mild insulin resistance and (C) glucose intolerance at 20-month old. ITT, Insulin tolerance test; IPGTT, intraperitoneal glucose tolerance test.

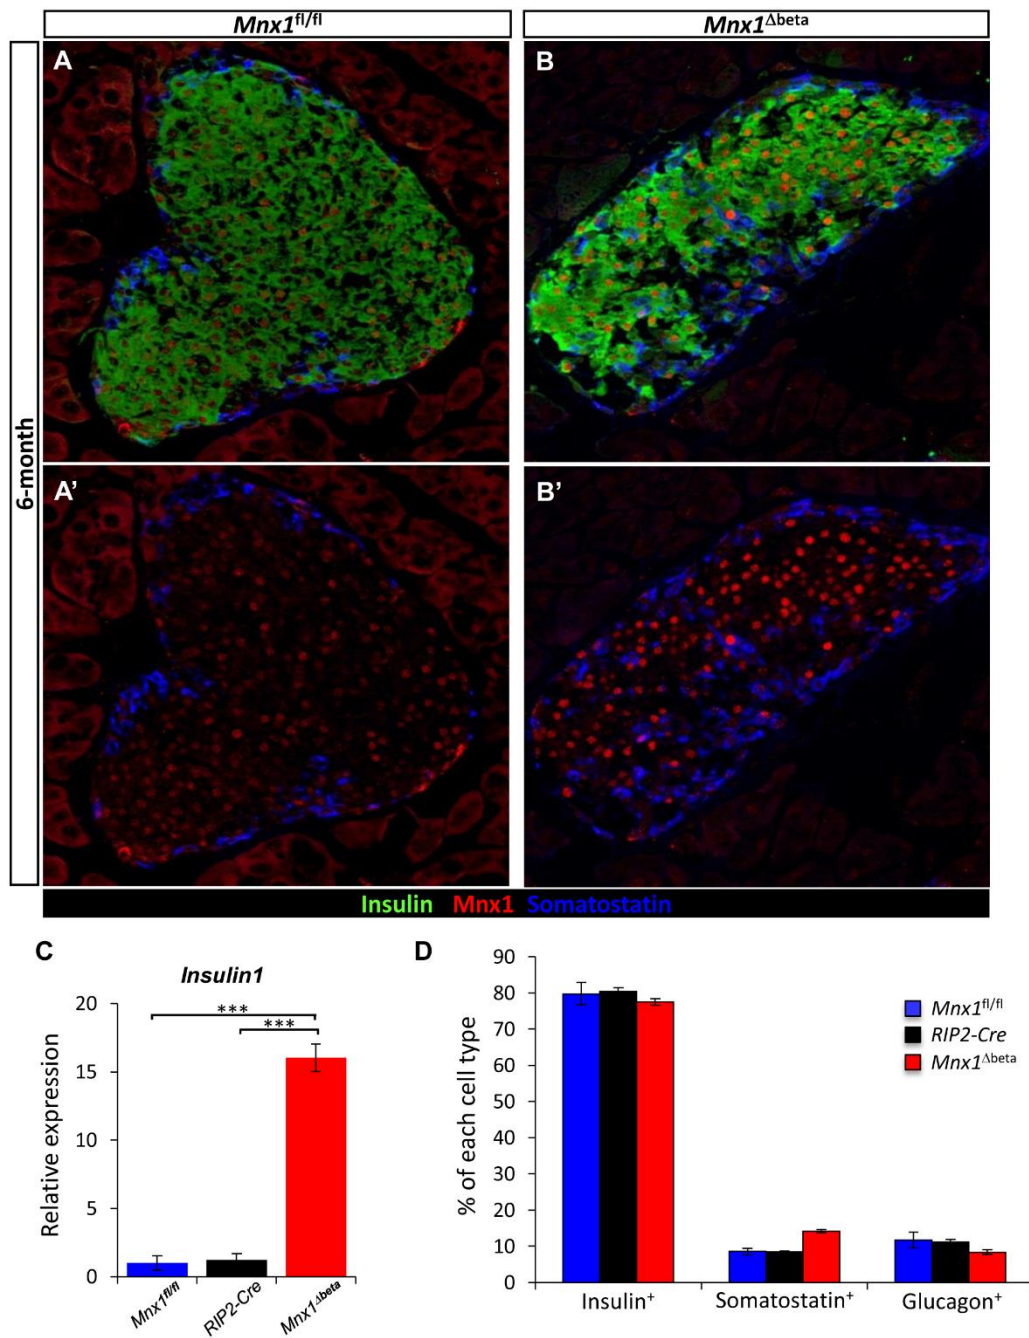

**Supplementary Fig. 8** *Mnx1* protein level and insulin mRNA expression were upregulated in the  $\beta$  cells of *Mnx1*<sup>Δbeta</sup> mutants. (A, A', B, B') Immunolabeling of *Mnx1* show that *Mnx1* protein was significantly induced in *Mnx1*<sup>Δbeta</sup>  $\beta$  cells at 6-month old. (C) qRT-PCR data showed that *Insulin1* mRNA expression is highly upregulated in the remaining Cre<sup>-</sup>  $\beta$  cells at 6-month old. (D) Quantitative analysis of  $\beta$ ,  $\delta$ , and  $\alpha$  cell fraction showing the percentage of  $\beta$  cells within islets of *Mnx1*<sup>Δbeta</sup> is comparable to control *Mnx1*<sup>fl/fl</sup> and *RIP2-Cre* at 14-month old.



Supplementary Table S1: List of antibodies used

| Primary antibodies     |            |                 |               |                                  |
|------------------------|------------|-----------------|---------------|----------------------------------|
| Antigen                | Species    | Dilution        | Staining type | Source                           |
| Mnx1                   | Rabbit     | 1:5000          | IF            | Samuel Pfaff (Salk Institute)    |
| Mnx1                   | Mouse      | 1:500           | TSA           | DSHB                             |
| Ptf1a                  | Goat       | 1:1000          | TSA           | Chris Wright                     |
| Sox9                   | Rabbit     | 1:1000          | IF            | Chemicon                         |
| Pax6                   | Rabbit     | 1:800           | TSA           | Covance                          |
| GFP                    | Rabbit     | 1:500<br>1:1000 | IF<br>TSA     | Clontech                         |
| Menin                  | Goat       | 1:500           | IF            | Bethyl                           |
| Insulin                | Guinea Pig | 1:1000          | IF            | Linco                            |
| Insulin-A              | Goat       | 1:250           | IF            | Santa Cruz                       |
| Glucagon               | Guinea Pig | 1:1000          | IF            | Linco                            |
| Glucagon               | Rabbit     | 1:1000          | IF            | Linco                            |
| Somatostatin           | Goat       | 1:1000          | IF            | Santa Cruz                       |
| Pancreatic Polypeptide | Guinea Pig | 1:1000          | IF            | Linco                            |
| Cpal                   | Goat       | 1:250           | IF            | BD Bioscience                    |
| E-cadherin             | Mouse      | 1:500           | IF            | BD Bioscience                    |
| Nkx6.1                 | Rabbit     | 1:1000          | IF            | BCBC                             |
| MafA                   | Rabbit     | 1:1000          | TSA           | Bethyl                           |
| GLUT2                  | Rat        | 1:200           | IF            | Alpha Diagnostic                 |
| Pdx1                   | Rabbit     | 1:1000          | IF            | Chris Wright (Vanderbilt)        |
| Ki67                   | Rabbit     | 1:500           | IF            | Sigma                            |
| Ngn3                   | Guinea Pig | 1:2000          | TSA           | Maike Sander (UCSD)              |
| Hhex                   | Rabbit     | 1:300           | IF            | Clifford Bogue (Yale University) |
| Cre                    | Rabbit     | 1:500           | IF            | Novagen                          |

| Secondary antibodies                     |              |          |                        |
|------------------------------------------|--------------|----------|------------------------|
| Antigen                                  | Conjugation  | Dilution | Source                 |
| Rabbit/Guinea pig/<br>Goat/Mouse/Chicken | Cy3          | 1:300    | Jackson ImmunoResearch |
| Rabbit/Guinea pig/<br>Goat/Mouse/Chicken | Cy2          | 1:300    | Jackson ImmunoResearch |
| Rabbit/Guinea pig/Goat/Mouse             | Cy5          | 1:300    | Jackson ImmunoResearch |
| Rabbit/Guinea pig/<br>Goat/Mouse/Chicken | Biotinylated | 1:1000   | Vector Laboratories    |

Supplementary Table S2: Primers used in qRT-PCRs

| Primer name            | Sequence                           |
|------------------------|------------------------------------|
| <b><i>GAPDH</i></b>    | Forward: AACTTTGGCATTGTGGAAGG      |
|                        | Reverse: GGATGCAGGGATGATGTTCT      |
| <b><i>Insulin1</i></b> | Forward: CAGCAAGCAGGTCATTGTTT      |
|                        | Reverse: GGGACCACAAAGATGCTGTT      |
| <b><i>Mnx1</i></b>     | Forward: AAGCGTTTTGAGGTGGCTAC      |
|                        | Reverse: CCATTTCAATCGGCGGTTCT      |
| <b><i>Cdkn2a</i></b>   | Forward: GGGATGATGGACTTTTGAGG      |
|                        | Reverse: TCTGGCTTCTAAGAGAAGATCTAA  |
| <b><i>Bmi1</i></b>     | Forward: AAACCAGACCACTCCTGAACA     |
|                        | Reverse: TCTTCTTCTTCTCATCTCATTTTGA |
| <b><i>Cdkn1a</i></b>   | Forward: GCTTGGATGTCAGCGGGA        |
|                        | Reverse: CAGAGTTTGCCTGAGACCCA      |
| <b><i>CDK4</i></b>     | Forward: CGAGCGTAAGATCCCCTGCT      |
|                        | Reverse: CGAGCGTAAGATCCCCTGCT      |
| <b><i>CDK6</i></b>     | Forward: TGCGAGTGCAGACCAAGTGG      |
|                        | Reverse: AGGTCTCCAGGTGCCTCAGC      |
| <b><i>CyclinD1</i></b> | Forward: CCCTCGGTGTCCTACTTCAA      |
|                        | Reverse: GGGGATGGTCTCCTTCATCT      |
| <b><i>Menin</i></b>    | Forward: ACCCACTCACCTTTATCACA      |
|                        | Reverse: ACATTTTCGGTTGCGACAGT      |
| <b><i>Insulin2</i></b> | Forward: GGCTTCTTCTACACACCCAT      |
|                        | Reverse: CCAAGGTCTGAAGGTCACCT      |
